# Supplementary material for: First-principles study on unidirectional proton transfer on anatase TiO2 (101) surface induced by external electric fields
Source: Royal Society of Chemistry journal article supplement (doi:10.1039/d3cp00577a), 2023-01-01
Supplement: d3cp00577a1.pdf [file d3cp00577a1.pdf]

## Supporting Information

### First-Principles Study on Unidirectional Proton Transfer on Anatase TiO<sub>2</sub> (101) Surface Induced by External Electric Fields

Takahiro Chiba<sup>a</sup>, Kenji Iida<sup>\*,a</sup>, Shinya Furukawa<sup>a</sup>, and Jun-ya Hasegawa<sup>a,b</sup>

<sup>a</sup> Institute for Catalysis, Hokkaido University, N21 W10 Kita-ku, Sapporo, 001-0021 Hokkaido, Japan.

<sup>b</sup> Interdisciplinary Research Center for Catalytic Chemistry, National Institute of Advanced Industrial Science and Technology, Central 5, 1-1-1 Higashi, Tsukuba, Ibaraki 305-8565, Japan.

E-mail: k-iida@cat.hokukai.ac.jp

#### S1. Electronic Polarization Directly Induced by External Electric Field

Our approach assumes that electronic polarization directly induced by the electric fields (EFs) can be neglected. To confirm this assumption, we evaluated the electronic polarization of two water molecules (within the system used in this study) directly induced by an external EF. The energy change due to the electrostatic interaction between the external EF ( $\varepsilon = 10^9$  V/m) and the induced dipole moment  $\Delta\mu$ , which corresponds to  $\Omega\mathbf{P}$ , is given as

$$\begin{aligned}\Delta\mu\varepsilon &= 2 \cdot 4\pi\varepsilon_0\alpha\varepsilon^2 \\ &= 2 \cdot 4\pi \cdot (8.854 \cdot 10^{-12} \text{ C}^2 \cdot \text{J}^{-1} \cdot \text{m}^{-1}) \cdot (1.45 \cdot 10^{-30} \text{ m}^3) \cdot (10^9 \text{ V} \cdot \text{m}^{-1})^2 \\ &= 3.226 \cdot 10^{-22} \text{ J} = 2.01 \cdot 10^{-3} \text{ eV}\end{aligned}$$

where the polarizability of the water molecule  $\alpha$  ( $1.45 \cdot 10^{-30} \text{ m}^3$ ) and the vacuum permittivity  $\varepsilon_0$  ( $8.854 \cdot 10^{-12} \text{ C}^2 \cdot \text{J}^{-1} \cdot \text{m}^{-1}$ ) were taken from the literature.<sup>S1</sup> The polarization  $\mathbf{P}$  represents the dipole moment per unit volume,<sup>S2</sup> and the change in  $\mathbf{P}$  of two water molecules directly induced by the external EF,  $\mathbf{P}_{\text{EF}}$ , is given by  $2 \cdot 4\pi\varepsilon_0\alpha \cdot \varepsilon^2 = \Omega\mathbf{P}_{\text{EF}}$ .<sup>S3</sup> The resultant energy change calculated for the water molecules ( $2.01 \cdot 10^{-3}$  eV) is 45 times smaller than, for example, the activation energy change for the R→TS1 transition (0.09 eV) discussed in the main manuscript. The large difference in the energy change was solely attributed to the amount of polarization. In other words, the polarization induced by an external EF contributes much less to the energy profile than the polarization due to the chemical reactions discussed in the main manuscript.

#### References

- S1. *CRC Handbook of Chemistry and Physics*, ed. W. M. Haynes, CRC Press, Boca Raton, FL, 2014.
- S2. J. D. Jackson, *Classical Electrodynamics*, 3rd ed., Wiley, 1999.
- S3. C. J. F. Böttcher, *Theory of Electronic Polarization*, 2nd ed., Elsevier, Amsterdam, 1973.

## S2. Geometrical Structures

(a) Structures in common to both pathways

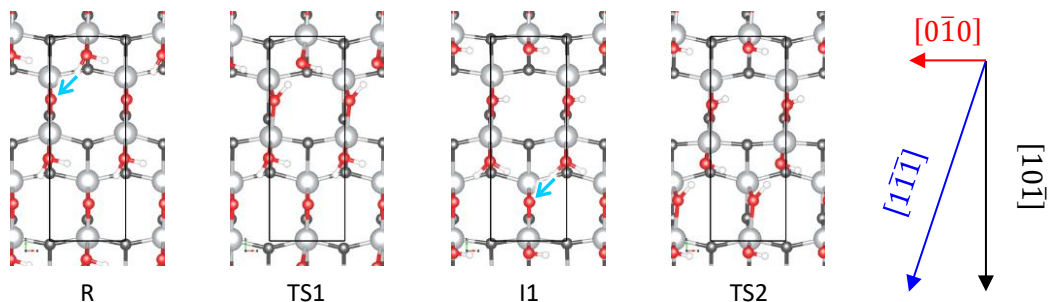

(b) Structures specific to the  $[0\bar{1}0]$  pathway

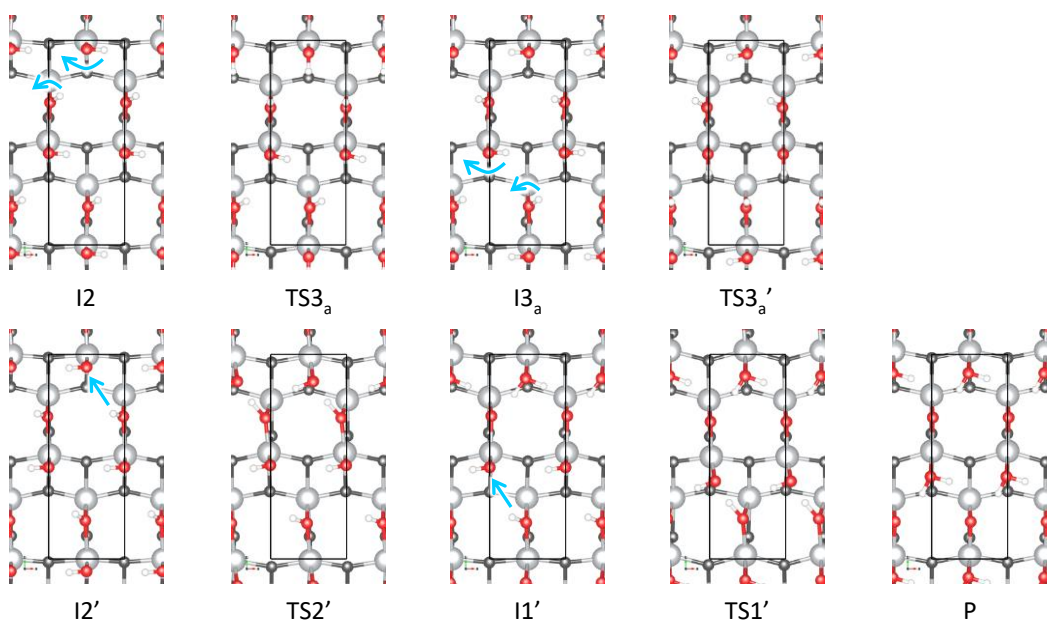

(c) Structures specific to the  $[1\bar{1}\bar{1}]$  pathway

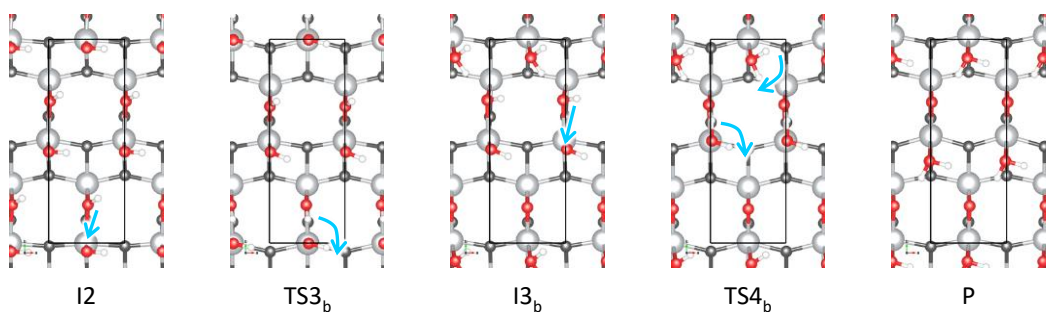

Figure S2: Geometrical structures (a) common to both pathways and specific to the (b)  $[0\bar{1}0]$  and (c)  $[1\bar{1}\bar{1}]$  pathways. The direction of the PT toward the next state is indicated by the cyan arrow.

### S3 Dependence of the Energy Profile on the Direction of Applied Electric Field

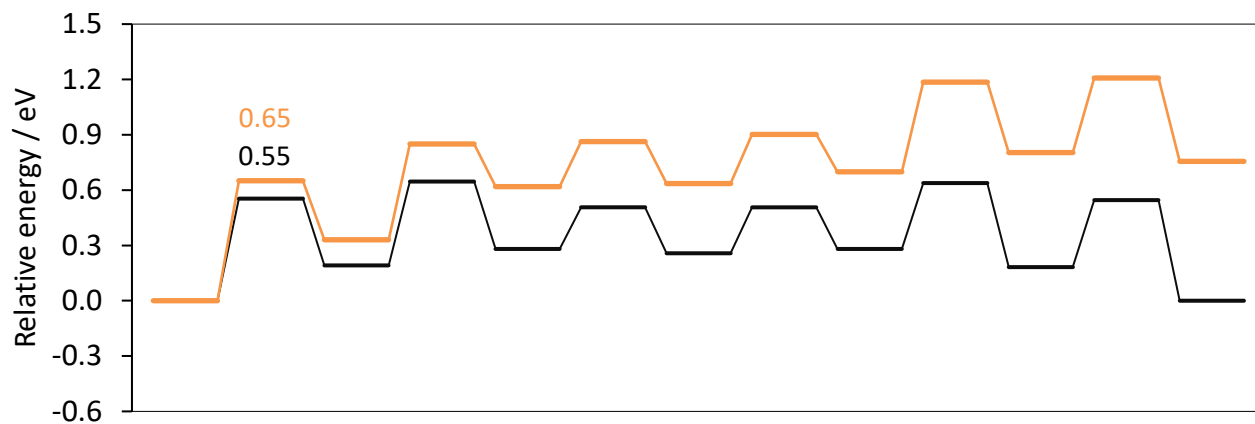

Figure S3: Energy diagram of the PT toward the  $[0\bar{1}0]$  direction without an EF (black line, the same as that of Figure 1 in the main manuscript) and under an  $10^9$  V/m EF along the  $[010]$  direction (orange line).

## S4 Cartesian Coordinates of Optimized Structures

| R, P |               |               |               |
|------|---------------|---------------|---------------|
| O    | 1.9409371054  | 1.8630676675  | 12.9543715864 |
| O    | 0.0521204870  | 7.0827602708  | 12.9515024412 |
| Ti   | 1.8938721217  | 0.1733927351  | 12.2076530749 |
| Ti   | 0.0027374889  | 5.3918362629  | 12.2038052356 |
| O    | 1.8947465134  | 4.8513296547  | 12.2497364931 |
| O    | 0.0038298568  | 10.0618734886 | 12.2516528536 |
| O    | 0.0068196274  | 3.3840763389  | 11.4222918270 |
| O    | 1.8981894867  | 8.5995325841  | 11.4107232403 |
| Ti   | 1.8885952558  | 2.9930315453  | 11.3885951786 |
| Ti   | -0.0016481269 | 8.2099141816  | 11.3809548154 |
| O    | 1.8880995129  | 1.0606080386  | 10.5985031789 |
| O    | -0.0110210099 | 6.2756770994  | 10.5948811316 |
| O    | 1.8967762433  | 3.2493586307  | 9.4043123360  |
| O    | 0.0063741789  | 8.4632846115  | 9.3997700210  |
| Ti   | 0.0006866699  | 6.6379874266  | 8.6510297939  |
| Ti   | 1.8916565005  | 1.4247468621  | 8.6558946681  |
| O    | 1.8895842446  | 6.2193400733  | 8.5421548557  |
| O    | -0.0012058175 | 1.0052889987  | 8.5462416847  |
| O    | -0.0000188353 | 4.7382275985  | 7.9311846782  |
| O    | 1.8909142687  | 9.9549026705  | 7.9304916228  |
| Ti   | 1.8904501221  | 4.3479173362  | 7.8101702938  |
| Ti   | -0.0003005495 | 9.5649110464  | 7.8093358230  |
| O    | 1.8884188481  | 2.4654175466  | 7.0602968496  |
| O    | -0.0024284270 | 7.6799956898  | 7.0584856668  |
| O    | 1.8908630000  | 4.6368580000  | 5.8721510000  |
| O    | 0.0000000000  | 9.8512340000  | 5.8721320000  |
| Ti   | 0.0000000000  | 7.9793790000  | 5.1437830000  |
| Ti   | 1.8908630000  | 2.7649550000  | 5.1437830000  |
| O    | 1.8908630000  | 7.5869150000  | 4.9910730000  |
| O    | 0.0000000000  | 2.3724150000  | 4.9910430000  |
| O    | 0.0000000000  | 6.1075240000  | 4.4154330000  |
| O    | 1.8908630000  | 0.8930530000  | 4.4154150000  |
| Ti   | 1.8908630000  | 5.7150320000  | 4.2627130000  |
| Ti   | 0.0000000000  | 0.5005470000  | 4.2626890000  |
| O    | 1.8908630000  | 3.8431630000  | 3.5343580000  |
| O    | 0.0000000000  | 9.0575120000  | 3.5343290000  |
| O    | 1.8908630000  | 6.0081940000  | 2.3478220000  |
| O    | 0.0000000000  | 0.7937220000  | 2.3478030000  |
| Ti   | 0.0000000000  | 9.3507150000  | 1.6194540000  |
| Ti   | 1.8908630000  | 4.1362920000  | 1.6194540000  |
| O    | 1.8908630000  | 8.9582510000  | 1.4667440000  |
| O    | 0.0000000000  | 3.7437510000  | 1.4667150000  |
| O    | 0.0000000000  | 7.4788600000  | 0.8911050000  |
| O    | 1.8908630000  | 2.2643890000  | 0.8910870000  |
| Ti   | 1.8908630000  | 7.0863680000  | 0.7383840000  |
| Ti   | 0.0000000000  | 1.8718830000  | 0.7383600000  |
| O    | 1.8908630000  | 5.2144990000  | 0.0100290000  |
| O    | 0.0000000000  | 0.0000000000  | 0.0100000000  |
| O    | 1.8309068966  | 9.3080879301  | 14.1464620156 |
| H    | 2.7474148702  | 9.0309828082  | 14.3363333603 |
| H    | 1.3885456598  | 8.4764046340  | 13.8522028055 |
| O    | -0.0586088843 | 4.1196581074  | 14.1577980942 |
| H    | 0.8620095640  | 3.8804112592  | 14.3762327909 |
| H    | -0.4640964295 | 3.2704343178  | 13.8631045107 |

| TS1 |               |               |               |
|-----|---------------|---------------|---------------|
| O   | -1.8454644106 | 1.8231327436  | 13.0043408001 |
| O   | 0.2376132255  | -3.2180240684 | 12.9559937126 |
| Ti  | -1.9339098484 | 0.0717798720  | 12.3724456799 |
| Ti  | 0.0737481203  | -5.0254179289 | 12.2007288238 |
| O   | -1.8508550141 | 4.9013815004  | 12.2881255585 |
| O   | -0.0498964257 | -0.3739805251 | 12.2041907017 |
| O   | 0.0321799150  | 3.4295749362  | 11.4918572472 |
| O   | -1.8971735680 | -1.7760762504 | 11.2319649109 |
| Ti  | 1.9024310585  | 2.9328270253  | 11.4329656282 |
| Ti  | -0.0528953922 | -2.1469848734 | 11.2444951922 |
| O   | 1.8508582998  | 1.0865587224  | 10.6603260459 |
| O   | -0.0370491745 | -4.1284497204 | 10.6121251752 |
| O   | -1.8701597268 | 3.2501914860  | 9.4442067915  |
| O   | 0.0045781994  | -1.9830343710 | 9.3349170357  |
| Ti  | -0.0041934470 | -3.8294050270 | 8.6096936052  |
| Ti  | -1.8968439619 | 1.4094317737  | 8.7517525752  |
| O   | 1.8825614348  | -4.2363567270 | 8.5489808250  |
| O   | -0.0099208330 | 0.9951590935  | 8.5816289188  |
| O   | -0.0033601245 | 4.7094327107  | 7.9265169740  |
| O   | -1.8971022400 | -0.4643910125 | 7.9355853139  |
| Ti  | 1.8857526746  | 4.2936529810  | 7.8083075004  |
| Ti  | -0.0072152044 | -0.8385849588 | 7.7851478022  |
| O   | 1.8779431763  | 2.4576107089  | 7.0806698195  |
| O   | -0.0090857651 | -2.7676178250 | 7.0420201231  |
| O   | -1.8908370000 | 4.6368580000  | 5.8721510000  |
| O   | 0.0000000000  | -0.5773160000 | 5.8721320000  |
| Ti  | 0.0000000000  | -2.4491710000 | 5.1437830000  |
| Ti  | -1.8908370000 | 2.7649550000  | 5.1437830000  |
| O   | -1.8908370000 | -2.8416350000 | 4.9910730000  |
| O   | 0.0000000000  | 2.3724150000  | 4.9910430000  |
| O   | 0.0000000000  | -4.3210260000 | 4.4154330000  |
| O   | -1.8908370000 | 0.8930530000  | 4.4154150000  |
| Ti  | -1.8908370000 | -4.7135180000 | 4.2627130000  |
| Ti  | 0.0000000000  | 0.5005470000  | 4.2626890000  |
| O   | -1.8908370000 | 3.8431630000  | 3.5343580000  |
| O   | 0.0000000000  | -1.3710380000 | 3.5343290000  |
| O   | -1.8908370000 | -4.4203560000 | 2.3478220000  |
| O   | 0.0000000000  | 0.7937220000  | 2.3478030000  |
| Ti  | 0.0000000000  | -1.0778350000 | 1.6194540000  |
| Ti  | -1.8908370000 | 4.1362920000  | 1.6194540000  |
| O   | -1.8908370000 | -1.4702990000 | 1.4667440000  |
| O   | 0.0000000000  | 3.7437510000  | 1.4667150000  |
| O   | 0.0000000000  | -2.9496900000 | 0.8911050000  |
| O   | -1.8908370000 | 2.2643890000  | 0.8910870000  |
| Ti  | -1.8908370000 | -3.3421820000 | 0.7383840000  |
| Ti  | 0.0000000000  | 1.8718830000  | 0.7383600000  |
| O   | -1.8908370000 | -5.2140510000 | 0.0100290000  |
| O   | 0.0000000000  | 0.0000000000  | 0.0100000000  |
| O   | 1.6193503250  | -1.3340968353 | 13.8843766489 |
| H   | -1.3172637164 | -1.6611727080 | 14.2462791018 |
| H   | 0.9258243998  | -2.4183326035 | 13.4818953337 |
| O   | -0.0348914144 | 4.1457975178  | 14.1903808485 |
| H   | 0.8748454223  | 3.8637274366  | 14.4034039704 |
| H   | -0.4713286770 | 3.3143999581  | 13.8923587571 |

| T1 |               |               |               |
|----|---------------|---------------|---------------|
| O  | 1.9409371054  | 1.8630676675  | 12.9543715864 |
| O  | 0.0521204870  | 7.0827602708  | 12.9515024412 |
| Ti | 1.8938721217  | 0.1733927351  | 12.2076530749 |
| Ti | 0.0027374889  | 5.3918362629  | 12.2038052356 |
| O  | 1.8947465134  | 4.8513296547  | 12.2497364931 |
| O  | 0.0038298568  | 10.0618734886 | 12.2516528536 |
| O  | 0.0068196274  | 3.3840763389  | 11.4222918270 |
| O  | 1.8981894867  | 8.5995325841  | 11.4107232403 |
| Ti | 1.8885952558  | 2.9930315453  | 11.3885951786 |
| Ti | -0.0016481269 | 8.2099141816  | 11.3809548154 |
| O  | 1.8800995129  | 1.0606080386  | 10.5985031789 |
| O  | -0.0110210099 | 6.2756770994  | 10.5948811316 |
| O  | 1.8967762433  | 3.2493586307  | 9.4043123360  |
| O  | 0.0063741789  | 8.4632846115  | 9.3997700210  |
| Ti | 0.0006866699  | 6.6379874266  | 8.6510297939  |
| Ti | 1.8916565005  | 1.4247468621  | 8.6558946681  |
| O  | 1.8895842446  | 6.2193400733  | 8.5421548557  |
| O  | -0.0012058175 | 1.0052889987  | 8.5462416847  |
| O  | -0.0000188353 | 4.7382275985  | 7.9311846782  |
| O  | 1.8909142687  | 9.9549026705  | 7.9304916228  |
| Ti | 1.8904501221  | 4.3479173362  | 7.8101702938  |
| Ti | -0.0003005495 | 9.5649110464  | 7.8093358230  |
| O  | 1.8884188481  | 2.4654175466  | 7.0602968496  |
| O  | -0.0024284270 | 7.6799956898  | 7.0584856668  |
| O  | 1.8908630000  | 4.6368580000  | 5.8721510000  |
| O  | 0.0000000000  | 9.8512340000  | 5.8721320000  |
| Ti | 0.0000000000  | 7.9793790000  | 5.1437830000  |
| Ti | 1.8908630000  | 2.7649550000  | 5.1437830000  |
| O  | 1.8908630000  | 7.5869150000  | 4.9910730000  |
| O  | 0.0000000000  | 2.3724150000  | 4.9910430000  |
| O  | 0.0000000000  | 6.1075240000  | 4.4154330000  |
| O  | 1.8908630000  | 0.8930530000  | 4.4154150000  |
| Ti | 1.8908630000  | 5.7150320000  | 4.2627130000  |
| Ti | 0.0000000000  | 0.5005470000  | 4.2626890000  |
| O  | 1.8908630000  | 3.8431630000  | 3.5343580000  |
| O  | 0.0000000000  | 9.0575120000  | 3.5343290000  |
| O  | 1.8908630000  | 6.0081940000  | 2.3478220000  |
| O  | 0.0000000000  | 0.7937220000  | 2.3478030000  |
| Ti | 0.0000000000  | 9.3507150000  | 1.6194540000  |
| Ti | 1.8908630000  | 4.1362920000  | 1.6194540000  |
| O  | 1.8908630000  | 8.9582510000  | 1.4667440000  |
| O  | 0.0000000000  | 3.7437510000  | 1.4667150000  |
| O  | 0.0000000000  | 7.4788600000  | 0.8911050000  |
| O  | 1.8908630000  | 2.2643890000  | 0.8910870000  |
| Ti | 1.8908630000  | 7.0863680000  | 0.7383840000  |
| Ti | 0.0000000000  | 1.8718830000  | 0.7383600000  |
| O  | 1.8908630000  | 5.2144990000  | 0.0100290000  |
| O  | 0.0000000000  | 0.0000000000  | 0.0100000000  |
| O  | 1.8309068966  | 9.3080879301  | 14.1464620156 |
| H  | 2.7474148702  | 9.0309828082  | 14.3363333603 |
| H  | 1.3885456598  | 8.4764046340  | 13.8522028055 |
| O  | -0.0586088843 | 4.1196581074  | 14.1577980942 |
| H  | 0.8620095640  | 3.8804112592  | 14.3762327909 |
| H  | -0.4640964295 | 3.2704343178  | 13.8631045107 |

| TS2 |               |               |               |
|-----|---------------|---------------|---------------|
| O   | -1.6348340608 | 2.0235656738  | 12.9465926214 |
| O   | 0.0691117425  | -3.4211672464 | 13.0602658440 |
| Ti  | 1.9763928151  | 0.0989646319  | 12.4700580131 |
| Ti  | -0.0592537154 | -5.2932107422 | 12.2566015663 |
| O   | -1.9432317792 | 4.8107430101  | 12.2132627908 |
| O   | 0.0429393283  | -0.3102033906 | 12.1975094544 |
| O   | -0.0169461440 | 3.4502311120  | 11.2213003900 |
| O   | -1.8536394703 | -1.8310802161 | 11.5485170990 |
| Ti  | -1.9322770126 | 2.9386236433  | 11.2167246255 |
| Ti  | 0.0328580476  | -2.1954409003 | 11.3409873042 |
| O   | -1.9412330123 | 1.1288436343  | 10.6082401876 |
| O   | -0.0602658717 | -4.0989127850 | 10.6780830009 |
| O   | -1.8728655230 | 3.2570837719  | 9.3300905027  |
| O   | 0.0292036963  | -1.9412012299 | 9.4583651508  |
| Ti  | -0.0114722572 | -3.8305394638 | 8.7429579976  |
| Ti  | -1.8909360945 | 1.3714084777  | 8.6789897614  |
| O   | 1.8763591443  | -4.2170919993 | 8.5945868721  |
| O   | -0.0082479137 | 0.9858491593  | 8.5192194531  |
| O   | -0.0079358697 | 4.7627545716  | 7.9326582235  |
| O   | -1.8923678774 | -0.5142386959 | 7.9458357561  |
| Ti  | 1.8796884410  | 4.3497984250  | 7.7725280273  |
| Ti  | -0.0029676712 | -0.8959973145 | 7.7856092739  |
| O   | -1.9058733157 | 2.4620344683  | 7.0446798926  |
| O   | -0.0154007374 | -2.7492278194 | 7.0922190220  |
| O   | -1.8908370000 | 4.6368580000  | 5.8721510000  |
| O   | 0.0000000000  | -0.5773160000 | 5.8721320000  |
| Ti  | 0.0000000000  | -2.4491710000 | 5.1437830000  |
| Ti  | -1.8908370000 | 2.7649550000  | 5.1437830000  |
| O   | -1.8908370000 | -2.8416350000 | 4.9910730000  |
| O   | 0.0000000000  | 2.3724150000  | 4.9910430000  |
| O   | 0.0000000000  | -4.3210260000 | 4.4154330000  |
| O   | -1.8908370000 | 0.8930530000  | 4.4154150000  |
| Ti  | -1.8908370000 | -4.7135180000 | 4.2627130000  |
| Ti  | 0.0000000000  | 0.5005470000  | 4.2626890000  |
| O   | -1.8908370000 | 3.8431630000  | 3.5343580000  |
| O   | 0.0000000000  | -1.3710380000 | 3.5343290000  |
| O   | -1.8908370000 | -4.4203560000 | 2.3478220000  |
| O   | 0.0000000000  | 0.7937220000  | 2.3478030000  |
| Ti  | 0.0000000000  | -1.0778350000 | 1.6194540000  |
| Ti  | -1.8908370000 | 4.1362920000  | 1.6194540000  |
| O   | -1.8908370000 | -1.4702990000 | 1.4667440000  |
| O   | 0.0000000000  | 3.7437510000  | 1.4667150000  |
| O   | 0.0000000000  | -2.9496900000 | 0.8911050000  |
| O   | -1.8908370000 | 2.2643890000  | 0.8910870000  |
| Ti  | -1.8908370000 | -3.3421820000 | 0.7383840000  |
| Ti  | 0.0000000000  | 1.8718830000  | 0.7383600000  |
| O   | -1.8908370000 | -5.2140510000 | 0.0100290000  |
| O   | 0.0000000000  | 0.0000000000  | 0.0100000000  |
| O   | -1.8837303057 | -0.5712207480 | 14.1931731406 |
| H   | -1.0533044679 | -0.7514944441 | 14.6705733338 |
| H   | 0.7465588564  | -3.1406023675 | 13.7026698400 |
| O   | -0.2537414785 | 3.8686434761  | 13.8860540750 |
| H   | 0.5997045971  | 3.5295899835  | 14.2167355540 |
| H   | -0.9577325250 | 2.8153223917  | 13.5013916422 |

| I2 |               |               |               |
|----|---------------|---------------|---------------|
| O  | 1.9584534584  | 1.9183401766  | 12.9784432060 |
| O  | 0.0668259948  | 7.1320323161  | 12.9785958388 |
| Ti | 1.8581019440  | -0.0179816664 | 12.3702335558 |
| Ti | -0.0332209611 | 5.1959393200  | 12.3700791838 |
| O  | 1.9088701386  | 4.8651932356  | 12.1591422883 |
| O  | 0.0185269422  | 10.0796209668 | 12.1593995477 |
| O  | 0.0190404718  | 3.4062713262  | 11.4253883840 |
| O  | 1.9100866492  | 8.6206465975  | 11.4258322700 |
| Ti | 1.9183307566  | 3.0010435205  | 11.2573174838 |
| Ti | 0.0277636008  | 8.2153022069  | 11.2575970607 |
| O  | 1.8816078708  | 1.1529500268  | 10.6394921702 |
| O  | -0.0094479125 | 6.3673184960  | 10.6395302386 |
| O  | 1.9116832954  | 3.2922729740  | 9.3921592995  |
| O  | 0.0208578157  | 8.5066066130  | 9.3923721120  |
| Ti | 0.0028915455  | 6.5981420568  | 8.7207570836  |
| Ti | 1.8939461176  | 1.3838179291  | 8.7207615158  |
| O  | 1.8920451934  | 6.2216016641  | 8.5517766585  |
| O  | 0.0013168097  | 1.0072197357  | 8.5521448451  |
| O  | 0.0032222535  | 4.7466311038  | 7.9380583696  |
| O  | 1.8941721593  | 9.9607802239  | 7.9382697736  |
| Ti | 1.8915464421  | 4.3481736095  | 7.7714349825  |
| Ti | 0.0008535626  | 9.5624357778  | 7.7716098103  |
| O  | 1.8872044783  | 2.4772291349  | 7.0693744492  |
| O  | -0.0037120592 | 7.6916691026  | 7.0694736560  |
| O  | 1.8908630000  | 4.6368580000  | 5.8721510000  |
| O  | 0.0000000000  | 9.8512340000  | 5.8721320000  |
| Ti | 0.0000000000  | 7.9793790000  | 5.1437830000  |
| Ti | 1.8908630000  | 2.7649550000  | 5.1437830000  |
| O  | 1.8908630000  | 7.5869150000  | 4.9910730000  |
| O  | 0.0000000000  | 2.3724150000  | 4.9910430000  |
| O  | 0.0000000000  | 6.1075240000  | 4.4154330000  |
| O  | 1.8908630000  | 0.8930530000  | 4.4154150000  |
| Ti | 1.8908630000  | 5.7150320000  | 4.2627130000  |
| Ti | 0.0000000000  | 0.5005470000  | 4.2626890000  |
| O  | 1.8908630000  | 3.8431630000  | 3.5343580000  |
| O  | 0.0000000000  | 9.0575120000  | 3.5343290000  |
| O  | 1.8908630000  | 6.0081940000  | 2.3478220000  |
| O  | 0.0000000000  | 0.7937220000  | 2.3478030000  |
| Ti | 0.0000000000  | 9.3507150000  | 1.6194540000  |
| Ti | 1.8908630000  | 4.1362920000  | 1.6194540000  |
| O  | 1.8908630000  | 8.9582510000  | 1.4667440000  |
| O  | 0.0000000000  | 3.7437510000  | 1.4667150000  |
| O  | 0.0000000000  | 7.4788600000  | 0.8911050000  |
| O  | 1.8908630000  | 2.2643890000  | 0.8910870000  |
| Ti | 1.8908630000  | 7.0863680000  | 0.7383840000  |
| Ti | 0.0000000000  | 1.8718830000  | 0.7383600000  |
| O  | 1.8908630000  | 5.2144990000  | 0.0100290000  |
| O  | 0.0000000000  | 0.0000000000  | 0.0100000000  |
| O  | 1.8983459393  | 9.8070013882  | 14.1347870807 |
| H  | 2.7597358868  | 9.7591931035  | 14.5881330021 |
| H  | 0.5588597461  | 7.4579864805  | 13.7514632416 |
| O  | 0.0061060691  | 4.5902349756  | 14.1340138959 |
| H  | 0.8675864225  | 4.5385703639  | 14.5867605697 |
| H  | 2.4522985326  | 2.2446580639  | 13.7500349542 |



| TS3 <sub>a</sub> |               |               |               |
|------------------|---------------|---------------|---------------|
| O                | -1.8100982379 | 1.8701011345  | 12.9974106421 |
| O                | 0.0013912706  | -3.3691360059 | 12.9902183065 |
| Ti               | 1.8994888737  | -0.0527251089 | 12.3829850524 |
| Ti               | -0.0382670251 | 5.1338444463  | 12.3569259726 |
| O                | -1.8936398498 | 4.8178798910  | 12.1343136044 |
| O                | 0.0176934977  | -0.3551871798 | 12.0581449284 |
| O                | 0.0042015076  | 3.3376774136  | 11.4373117270 |
| O                | -1.8742350897 | -1.8624664725 | 11.5211653402 |
| Ti               | -1.8885870504 | 2.9466574209  | 11.2463095974 |
| Ti               | 0.0193262495  | -2.2283330802 | 11.2756504389 |
| O                | 1.8586900321  | 1.1228213593  | 10.6140162725 |
| O                | 0.0173409919  | -4.0891750277 | 10.6498461476 |
| O                | -1.8717811858 | 3.2792458946  | 9.3920532656  |
| O                | 0.0057890849  | -1.9341150909 | 9.4214905721  |
| Ti               | 0.0082290076  | -3.8465274306 | 8.7421562055  |
| Ti               | -1.8939283351 | 1.3664587355  | 8.7109912182  |
| O                | -1.8825756820 | -4.2142865287 | 8.5590663922  |
| O                | -0.0060343559 | 0.9994162697  | 8.5237424644  |
| O                | 0.0077510971  | 4.7384095020  | 7.9451887937  |
| O                | -1.8936175100 | -0.4965977452 | 7.9520418404  |
| Ti               | -1.8838074266 | 4.3400591328  | 7.7722188721  |
| Ti               | -0.0041218667 | -0.8852168928 | 7.7714158817  |
| O                | 1.8847538941  | 2.4762008742  | 7.0654421588  |
| O                | 0.0028769908  | -2.7416711076 | 7.0782535997  |
| O                | -1.8908370000 | 4.6368580000  | 5.8721510000  |
| O                | 0.0000000000  | -0.5773160000 | 5.8721320000  |
| Ti               | 0.0000000000  | -2.4491710000 | 5.1437830000  |
| Ti               | -1.8908370000 | 2.7649550000  | 5.1437830000  |
| O                | -1.8908370000 | -2.8416350000 | 4.9910730000  |
| O                | 0.0000000000  | 2.3724150000  | 4.9910430000  |
| O                | 0.0000000000  | -4.3210260000 | 4.4154330000  |
| O                | -1.8908370000 | 0.8930530000  | 4.4154150000  |
| Ti               | -1.8908370000 | -4.7135180000 | 4.2627130000  |
| Ti               | 0.0000000000  | 0.5005470000  | 4.2626890000  |
| O                | -1.8908370000 | 3.8431630000  | 3.5343580000  |
| O                | 0.0000000000  | -1.3710380000 | 3.5343290000  |
| O                | -1.8908370000 | -4.4203560000 | 2.3478220000  |
| O                | 0.0000000000  | 0.7937220000  | 2.3478030000  |
| Ti               | 0.0000000000  | -1.0778350000 | 1.6194540000  |
| Ti               | -1.8908370000 | 4.1362920000  | 1.6194540000  |
| O                | -1.8908370000 | -1.4702990000 | 1.4667440000  |
| O                | 0.0000000000  | 3.7437510000  | 1.4667150000  |
| O                | 0.0000000000  | -2.9496900000 | 0.8911050000  |
| O                | -1.8908370000 | 2.2643890000  | 0.8910870000  |
| Ti               | -1.8908370000 | -3.3421820000 | 0.7383840000  |
| Ti               | 0.0000000000  | 1.8718830000  | 0.7383600000  |
| O                | -1.8908370000 | -5.2140510000 | 0.0100290000  |
| O                | 0.0000000000  | 0.0000000000  | 0.0100000000  |
| O                | -1.8672239405 | -0.6139748563 | 14.1418158033 |
| H                | -1.8772977340 | -1.5537867941 | 14.3847408551 |
| H                | -0.0066791009 | -3.0939665122 | 13.9179082065 |
| O                | -0.0294193254 | 4.5118186353  | 14.1177590514 |
| H                | 0.8298479488  | 4.2921100774  | 14.5217980352 |
| H                | -1.2177390342 | 2.1859242031  | 13.7044610486 |

| I3 <sub>a</sub> |               |               |               |
|-----------------|---------------|---------------|---------------|
| O               | 1.9484625940  | 1.9279217460  | 12.9756409435 |
| O               | -0.0574300386 | 7.1434322459  | 12.9750773673 |
| Ti              | 1.9673692024  | -0.0109871415 | 12.3609532576 |
| Ti              | -0.0755670702 | 5.2039793907  | 12.3607511960 |
| O               | 1.8687272026  | 4.8684171606  | 12.1567132959 |
| O               | 0.0231691028  | 10.0822738422 | 12.1570000075 |
| O               | -0.0182771673 | 3.4119304068  | 11.4179140733 |
| O               | 1.9099186068  | 8.6264974844  | 11.4164451982 |
| Ti              | 1.8679820911  | 3.0061556539  | 11.2583476119 |
| Ti              | 0.0235742900  | 8.2204702941  | 11.2576591125 |
| O               | 1.8412821407  | 1.1556146468  | 10.6423445331 |
| O               | 0.0504881374  | 6.3698775497  | 10.6420725261 |
| O               | 1.8995082118  | 3.2915723339  | 9.3906092445  |
| O               | -0.0083048710 | 8.5059452572  | 9.3899408845  |
| Ti              | 0.0101394030  | 6.5997759627  | 8.7203364431  |
| Ti              | 1.8809163588  | 1.3854492721  | 8.7209627712  |
| O               | 1.9043409271  | 6.2209991748  | 8.5537501282  |
| O               | -0.0132158036 | 1.0068518894  | 8.5540607263  |
| O               | 0.0090638185  | 4.7472278470  | 7.9381433320  |
| O               | 1.8820067622  | 9.9617110753  | 7.9381774989  |
| Ti              | 1.8992868620  | 4.3484542175  | 7.7719813015  |
| Ti              | -0.0081503103 | 9.5631650617  | 7.7719116028  |
| O               | 1.8828792884  | 2.4763179882  | 7.0693318193  |
| O               | 0.0081959019  | 7.6906404486  | 7.0690954455  |
| O               | 1.8908630000  | 4.6368580000  | 5.8721510000  |
| O               | 0.0000000000  | 9.8512340000  | 5.8721320000  |
| Ti              | 0.0000000000  | 7.9793790000  | 5.1437830000  |
| Ti              | 1.8908630000  | 2.7649550000  | 5.1437830000  |
| O               | 1.8908630000  | 7.5869150000  | 4.9910730000  |
| O               | 0.0000000000  | 2.3724150000  | 4.9910430000  |
| O               | 0.0000000000  | 6.1075240000  | 4.4154330000  |
| O               | 1.8908630000  | 0.8930530000  | 4.4154150000  |
| Ti              | 1.8908630000  | 5.7150320000  | 4.2627130000  |
| Ti              | 0.0000000000  | 0.5005470000  | 4.2626890000  |
| O               | 1.8908630000  | 3.8431630000  | 3.5343580000  |
| O               | 0.0000000000  | 9.0575120000  | 3.5343290000  |
| O               | 1.8908630000  | 6.0081940000  | 2.3478220000  |
| O               | 0.0000000000  | 0.7937220000  | 2.3478030000  |
| Ti              | 0.0000000000  | 9.3507150000  | 1.6194540000  |
| Ti              | 1.8908630000  | 4.1362920000  | 1.6194540000  |
| O               | 1.8908630000  | 8.9582510000  | 1.4667440000  |
| O               | 0.0000000000  | 3.7437510000  | 1.4667150000  |
| O               | 0.0000000000  | 7.4788600000  | 0.8911050000  |
| O               | 1.8908630000  | 2.2643890000  | 0.8910870000  |
| Ti              | 1.8908630000  | 7.0863680000  | 0.7383840000  |
| Ti              | 0.0000000000  | 1.8718830000  | 0.7383600000  |
| O               | 1.8908630000  | 5.2144990000  | 0.0100290000  |
| O               | 0.0000000000  | 0.0000000000  | 0.0100000000  |
| O               | 1.9509527358  | -0.6099594916 | 14.1294838499 |
| H               | -2.6802497285 | -0.5963925329 | 14.6072156806 |
| H               | -0.5432248249 | -2.9435443652 | 13.7459032719 |
| O               | -0.0583624099 | 4.6077294011  | 14.1300962538 |
| H               | 0.7906882127  | 4.6252014543  | 14.6085227315 |
| H               | -1.3492168324 | 2.2692198448  | 13.7476435980 |

| TS3 <sub>a</sub> ' |               |               |               |
|--------------------|---------------|---------------|---------------|
| O                  | -1.9022187922 | 1.8561236576  | 12.9846305899 |
| O                  | -0.0727749101 | -3.3546073104 | 13.0116843762 |
| Ti                 | -1.8462175082 | -0.0753938571 | 12.3553574860 |
| Ti                 | -0.0094783558 | 5.1567550889  | 12.4001884806 |
| O                  | 1.8697797709  | 4.8594213874  | 12.0732377249 |
| O                  | 0.0081792969  | -0.3960526297 | 12.1369612590 |
| O                  | -0.0193444404 | 3.3595984969  | 11.5084232085 |
| O                  | -1.8893409369 | -1.8814120040 | 11.4493572504 |
| Ti                 | 1.8705209457  | 2.9929256579  | 11.2730407168 |
| Ti                 | 0.0036049977  | -2.2729518962 | 11.2527462101 |
| O                  | 1.8756445865  | 1.1287606951  | 10.6503976819 |
| O                  | 0.0304576983  | -4.0916653287 | 10.6199733612 |
| O                  | -1.8980340010 | 3.2828892607  | 9.4181161486  |
| O                  | -0.0140635796 | -1.9324204039 | 9.3990758400  |
| Ti                 | 0.0024426645  | -3.8447485446 | 8.7161476346  |
| Ti                 | 1.8842975014  | 1.3707368060  | 8.7412100480  |
| O                  | -1.8852446035 | -4.2127380207 | 8.5300147186  |
| O                  | -0.0066927428 | 1.0017971010  | 8.5598492059  |
| O                  | 0.0022619454  | 4.7235006089  | 7.9488786959  |
| O                  | 1.8849284358  | -0.4750725140 | 7.9464614542  |
| Ti                 | -1.8875792962 | 4.3325049754  | 7.7712391175  |
| Ti                 | -0.0050649597 | -0.8741906426 | 7.7739292505  |
| O                  | 1.8887562117  | 2.4744240377  | 7.0776591945  |
| O                  | 0.0055292544  | -2.7357814955 | 7.0681205222  |
| O                  | -1.8908370000 | 4.6368580000  | 5.8721510000  |
| O                  | 0.0000000000  | -0.5773160000 | 5.8721320000  |
| Ti                 | 0.0000000000  | -2.4491710000 | 5.1437830000  |
| Ti                 | -1.8908370000 | 2.7649550000  | 5.1437830000  |
| O                  | -1.8908370000 | -2.8416350000 | 4.9910730000  |
| O                  | 0.0000000000  | 2.3724150000  | 4.9910430000  |
| O                  | 0.0000000000  | -4.3210260000 | 4.4154330000  |
| O                  | -1.8908370000 | 0.8930530000  | 4.4154150000  |
| Ti                 | -1.8908370000 | -4.7135180000 | 4.2627130000  |
| Ti                 | 0.0000000000  | 0.5005470000  | 4.2626890000  |
| O                  | -1.8908370000 | 3.8431630000  | 3.5343580000  |
| O                  | 0.0000000000  | -1.3710380000 | 3.5343290000  |
| O                  | -1.8908370000 | -4.4203560000 | 2.3478220000  |
| O                  | 0.0000000000  | 0.7937220000  | 2.3478030000  |
| Ti                 | 0.0000000000  | -1.0778350000 | 1.6194540000  |
| Ti                 | -1.8908370000 | 4.1362920000  | 1.6194540000  |
| O                  | -1.8908370000 | -1.4702990000 | 1.4667440000  |
| O                  | 0.0000000000  | 3.7437510000  | 1.4667150000  |
| O                  | 0.0000000000  | -2.9496900000 | 0.8911050000  |
| O                  | -1.8908370000 | 2.2643890000  | 0.8910870000  |
| Ti                 | -1.8908370000 | -3.3421820000 | 0.7383840000  |
| Ti                 | 0.0000000000  | 1.8718830000  | 0.7383600000  |
| O                  | -1.8908370000 | -5.2140510000 | 0.0100290000  |
| O                  | 0.0000000000  | 0.0000000000  | 0.0100000000  |
| O                  | -1.8435926673 | -0.6743405681 | 14.1256278346 |
| H                  | 1.0797794907  | -0.8482546722 | 14.5532466166 |
| H                  | -0.6541099324 | -3.0256933111 | 13.7217780854 |
| O                  | -0.0320801534 | 4.5438373822  | 14.1418362614 |
| H                  | 0.0141571539  | 3.5949080720  | 14.3442215689 |
| H                  | -1.8592869796 | 2.1416601240  | 13.9083235002 |

| I2' |               |               |               |
|-----|---------------|---------------|---------------|
| O   | 1.8248238796  | 1.9175854853  | 12.9784077195 |
| O   | -0.0670186763 | 7.1326241537  | 12.9782461540 |
| Ti  | 1.9247260662  | -0.0184489612 | 12.3694110268 |
| Ti  | 0.0332746228  | 5.1962668572  | 12.3698922657 |
| O   | 1.8730902782  | 4.8656345571  | 12.1585244169 |
| O   | -0.0171664661 | 10.0794630100 | 12.1582213089 |
| O   | -0.0185870198 | 3.4060217962  | 11.4261431566 |
| O   | 1.8725174428  | 8.6201602293  | 11.4251996872 |
| Ti  | 1.8641152405  | 3.0009780123  | 11.2575577576 |
| Ti  | -0.0263895227 | 8.2151332024  | 11.2570493684 |
| O   | 1.9011957590  | 1.1530821902  | 10.6393546545 |
| O   | 0.0102032757  | 6.3672248814  | 10.6391984837 |
| O   | 1.8701743699  | 3.2924848018  | 9.3924779977  |
| O   | -0.0206516650 | 8.5067128538  | 9.3920222800  |
| Ti  | -0.0029536074 | 6.5982510301  | 8.7206318581  |
| Ti  | 1.8880584998  | 1.3840882014  | 8.7207360600  |
| O   | 1.8898381727  | 6.2216447055  | 8.5519770790  |
| O   | -0.0009286079 | 1.0074424988  | 8.5519640290  |
| O   | -0.0031018362 | 4.7465356110  | 7.9384705717  |
| O   | 1.88781444818 | 9.9611503136  | 7.9379710736  |
| Ti  | 1.8902505283  | 4.3482369064  | 7.7716103902  |
| Ti  | -0.0004892949 | 9.5626171647  | 7.7714656479  |
| O   | 1.8949067461  | 2.4775526122  | 7.0694507478  |
| O   | 0.0040215256  | 7.6917560230  | 7.0692831614  |
| O   | 1.8908630000  | 4.6368580000  | 5.8721510000  |
| O   | 0.0000000000  | 9.8512340000  | 5.8721320000  |
| Ti  | 0.0000000000  | 7.9793790000  | 5.1437830000  |
| Ti  | 1.8908630000  | 2.7649550000  | 5.1437830000  |
| O   | 1.8908630000  | 7.5869150000  | 4.9910730000  |
| O   | 0.0000000000  | 2.3724150000  | 4.9910430000  |
| O   | 0.0000000000  | 6.1075240000  | 4.4154330000  |
| O   | 1.8908630000  | 0.8930530000  | 4.4154150000  |
| Ti  | 1.8908630000  | 5.7150320000  | 4.2627130000  |
| Ti  | 0.0000000000  | 0.5005470000  | 4.2626890000  |
| O   | 1.8908630000  | 3.8431630000  | 3.5343580000  |
| O   | 0.0000000000  | 9.0575120000  | 3.5343290000  |
| O   | 1.8908630000  | 6.0081940000  | 2.3478220000  |
| O   | 0.0000000000  | 0.7937220000  | 2.3478030000  |
| Ti  | 0.0000000000  | 9.3507150000  | 1.6194540000  |
| Ti  | 1.8908630000  | 4.1362920000  | 1.6194540000  |
| O   | 1.8908630000  | 8.9582510000  | 1.4667440000  |
| O   | 0.0000000000  | 3.7437510000  | 1.4667150000  |
| O   | 0.0000000000  | 7.4788600000  | 0.8911050000  |
| O   | 1.8908630000  | 2.2643890000  | 0.8910870000  |
| Ti  | 1.8908630000  | 7.0863680000  | 0.7383840000  |
| Ti  | 0.0000000000  | 1.8718830000  | 0.7383600000  |
| O   | 1.8908630000  | 5.2144990000  | 0.0100290000  |
| O   | 0.0000000000  | 0.0000000000  | 0.0100000000  |
| O   | 1.8861217588  | -0.6246254666 | 14.1332217006 |
| H   | -2.7568950652 | -0.6770409751 | 14.5861840965 |
| H   | -0.5615903372 | -2.9688616587 | 13.7491270205 |
| O   | -0.0062778871 | 4.5918896384  | 14.1341512871 |
| H   | -0.8673839330 | 4.5430121129  | 14.5879415666 |
| H   | -2.4495859557 | 2.2436655282  | 13.7508408369 |

| TS2' |               |               |               |
|------|---------------|---------------|---------------|
| O    | 1.8143498538  | 1.7836174380  | 13.0649714234 |
| O    | -0.2626700064 | -3.1779701594 | 12.9312767469 |
| Ti   | -1.8166617108 | -0.0776109646 | 12.2519659954 |
| Ti   | -0.0908255882 | 5.3204320686  | 12.4592451777 |
| O    | 1.8395453467  | 4.9120298299  | 12.1829960758 |
| O    | 0.0431392360  | -0.3987209329 | 12.2045369274 |
| O    | -0.0439049782 | 3.3761540295  | 11.5686160475 |
| O    | 1.9023554291  | -1.7549671493 | 11.2063569703 |
| Ti   | 1.8393506593  | 3.0194688269  | 11.3445910213 |
| Ti   | 0.0368494846  | -2.2658891848 | 11.2032953663 |
| O    | -1.8397350322 | 1.1224168587  | 10.6754140266 |
| O    | 0.0462560191  | -4.0790947701 | 10.5970472950 |
| O    | 1.8598284687  | 3.2820128560  | 9.4638878479  |
| O    | -0.0195691022 | -1.9520876860 | 9.3193039260  |
| Ti   | 0.0011721695  | -3.8407132731 | 8.6701418962  |
| Ti   | 1.9042951502  | 1.3890221940  | 8.7442594109  |
| O    | 1.8992422377  | -4.2223656415 | 8.5060933829  |
| O    | 0.0139882182  | 1.0019013706  | 8.5982146805  |
| O    | 0.0019032530  | 4.6995449017  | 7.9504034269  |
| O    | 1.8990193804  | -0.4411261195 | 7.9273880767  |
| Ti   | 1.8957118132  | 4.3213702848  | 7.7859756585  |
| Ti   | 0.0125469418  | -0.8551721728 | 7.7692388188  |
| O    | -1.8750658311 | 2.4686454372  | 7.0938851042  |
| O    | 0.0156276326  | -2.7484678077 | 7.0406040375  |
| O    | -1.8908370000 | 4.6368580000  | 5.8721510000  |
| O    | 0.0000000000  | -0.5773160000 | 5.8721320000  |
| Ti   | 0.0000000000  | -2.4491710000 | 5.1437830000  |
| Ti   | -1.8908370000 | 2.7649550000  | 5.1437830000  |
| O    | -1.8908370000 | -2.8416350000 | 4.9910730000  |
| O    | 0.0000000000  | 2.3724150000  | 4.9910430000  |
| O    | 0.0000000000  | -4.3210260000 | 4.4154330000  |
| O    | -1.8908370000 | 0.8930530000  | 4.4154150000  |
| Ti   | -1.8908370000 | -4.7135180000 | 4.2627130000  |
| Ti   | 0.0000000000  | 0.5005470000  | 4.2626890000  |
| O    | -1.8908370000 | 3.8431630000  | 3.5343580000  |
| O    | 0.0000000000  | -1.3710380000 | 3.5343290000  |
| O    | -1.8908370000 | -4.4203560000 | 2.3478220000  |
| O    | 0.0000000000  | 0.7937220000  | 2.3478030000  |
| Ti   | 0.0000000000  | -1.0778350000 | 1.6194540000  |
| Ti   | -1.8908370000 | 4.1362920000  | 1.6194540000  |
| O    | -1.8908370000 | -1.4702990000 | 1.4667440000  |
| O    | 0.0000000000  | 3.7437510000  | 1.4667150000  |
| O    | 0.0000000000  | -2.9496900000 | 0.8911050000  |
| O    | -1.8908370000 | 2.2643890000  | 0.8910870000  |
| Ti   | -1.8908370000 | -3.3421820000 | 0.7383840000  |
| Ti   | 0.0000000000  | 1.8718830000  | 0.7383600000  |
| O    | -1.8908370000 | -5.2140510000 | 0.0100290000  |
| O    | 0.0000000000  | 0.0000000000  | 0.0100000000  |
| O    | 2.1187094939  | -1.3514992922 | 13.8714271820 |
| H    | 1.2559113308  | -1.7026039483 | 14.1641860150 |
| H    | -0.9429331360 | -2.4021185896 | 13.4850007865 |
| O    | -0.0237491011 | 4.6894473226  | 14.1936708725 |
| H    | -0.8536678324 | 4.5368168154  | 14.6815592591 |
| H    | 1.1097591507  | 2.0312182358  | 13.6913099465 |

| T1' |               |               |               |
|-----|---------------|---------------|---------------|
| O   | 1.8222290666  | 1.8169828157  | 13.0131311100 |
| O   | 0.0826884615  | 7.1572260319  | 12.9566566553 |
| Ti  | 1.8950229825  | 0.0138281709  | 12.0991348808 |
| Ti  | 0.0574171259  | 5.3199695967  | 12.4765822444 |
| O   | 1.9000169606  | 4.8839840203  | 12.1656526439 |
| O   | -0.0205393406 | 10.0583388457 | 12.2330369820 |
| O   | 0.0095377376  | 3.3550651473  | 11.5091111157 |
| O   | 1.8773013308  | 8.6267409312  | 11.3467220832 |
| Ti  | 1.8477795641  | 3.0721724481  | 11.3157851674 |
| Ti  | -0.0196868283 | 8.1042856761  | 11.3380168434 |
| O   | 1.9264153485  | 1.0922326436  | 10.6172826861 |
| O   | -0.0424979752 | 6.3158236730  | 10.6090464102 |
| O   | 1.8841507130  | 3.2741357353  | 9.4260434761  |
| O   | 0.0083110006  | 8.4791775921  | 9.3774413968  |
| Ti  | -0.0100299696 | 6.6177295864  | 8.7155692098  |
| Ti  | 1.9028046226  | 1.3990539581  | 8.6474787141  |
| O   | 1.8793880635  | 6.2212400643  | 8.5253741952  |
| O   | 0.0113113131  | 1.0060793031  | 8.5617229360  |
| O   | -0.0078339184 | 4.7257934318  | 7.9483954214  |
| O   | 1.8990176504  | 9.9690589633  | 7.9243479399  |
| Ti  | 1.8813998718  | 4.3676342008  | 7.7916794239  |
| Ti  | 0.0083301076  | 9.5367696850  | 7.7926057331  |
| O   | 1.8967342768  | 2.4728012020  | 7.0736707259  |
| O   | -0.0067923220 | 7.6840232253  | 7.0546862947  |
| O   | 1.8908630000  | 4.6368580000  | 5.8721510000  |
| O   | 0.0000000000  | 9.8512340000  | 5.8721320000  |
| Ti  | 0.0000000000  | 7.9793790000  | 5.1437830000  |
| Ti  | 1.8908630000  | 2.7649550000  | 5.1437830000  |
| O   | 1.8908630000  | 7.5869150000  | 4.9910730000  |
| O   | 0.0000000000  | 2.3724150000  | 4.9910430000  |
| O   | 0.0000000000  | 6.1075240000  | 4.4154330000  |
| O   | 1.8908630000  | 0.8930530000  | 4.4154150000  |
| Ti  | 1.8908630000  | 5.7150320000  | 4.2627130000  |
| Ti  | 0.0000000000  | 0.5005470000  | 4.2626890000  |
| O   | 1.8908630000  | 3.8431630000  | 3.5343580000  |
| O   | 0.0000000000  | 9.0575120000  | 3.5343290000  |
| O   | 1.8908630000  | 6.0081940000  | 2.3478220000  |
| O   | 0.0000000000  | 0.7937220000  | 2.3478030000  |
| Ti  | 0.0000000000  | 9.3507150000  | 1.6194540000  |
| Ti  | 1.8908630000  | 4.1362920000  | 1.6194540000  |
| O   | 1.8908630000  | 8.9582510000  | 1.4667440000  |
| O   | 0.0000000000  | 3.7437510000  | 1.4667150000  |
| O   | 0.0000000000  | 7.4788600000  | 0.8911050000  |
| O   | 1.8908630000  | 2.2643890000  | 0.8910870000  |
| Ti  | 1.8908630000  | 7.0863680000  | 0.7383840000  |
| Ti  | 0.0000000000  | 1.8718830000  | 0.7383600000  |
| O   | 1.8908630000  | 5.2144990000  | 0.0100290000  |
| O   | 0.0000000000  | 0.0000000000  | 0.0100000000  |
| O   | -1.9863649826 | -1.1976898056 | 14.0789039513 |
| H   | 1.2343986552  | -1.9781940168 | 13.8292267331 |
| H   | -1.1011026289 | -1.5904206238 | 14.2094766452 |
| O   | -0.0024754097 | 4.5843759682  | 14.1767808096 |
| H   | -0.8419083336 | 4.4715208642  | 14.6571872141 |
| H   | 1.1274563508  | 2.0824392198  | 13.6440970713 |

| TS1' |               |               |               |
|------|---------------|---------------|---------------|
| O    | 1.6587598439  | 2.0079496837  | 12.9548423883 |
| O    | 0.0391729876  | -3.3675540958 | 13.0016398302 |
| Ti   | -2.0040456832 | 0.1977139847  | 12.2036726073 |
| Ti   | 0.0780334866  | -5.1216137686 | 12.3717625110 |
| O    | -1.8260605057 | 4.8568952323  | 12.2008435531 |
| O    | -0.0671364300 | -0.3033530369 | 12.2892740278 |
| O    | 0.0165482723  | 3.4454722937  | 11.2304270711 |
| O    | 1.8397311878  | -1.7698390724 | 11.4701006134 |
| Ti   | 1.9800296897  | 3.0758408075  | 11.2431447143 |
| Ti   | -0.0385650206 | -2.2668244255 | 11.4160759676 |
| O    | -1.8623551890 | 1.0944739325  | 10.6125347444 |
| O    | 0.0117950689  | -4.1144996988 | 10.6569420724 |
| O    | 1.8816134221  | 3.2403034052  | 9.3358747912  |
| O    | -0.0268834147 | -1.9564398541 | 9.4351583832  |
| Ti   | 0.0003432222  | -3.8025141074 | 8.7437452037  |
| Ti   | -1.9029867891 | 1.3913608977  | 8.6142724498  |
| O    | 1.8910381412  | -4.2167665722 | 8.5822789437  |
| O    | -0.0018953200 | 0.9861910457  | 8.5471560647  |
| O    | -0.0008598751 | 4.7558406859  | 7.9310045914  |
| O    | -1.8966604944 | -0.4956698293 | 7.9274103325  |
| Ti   | 1.8928465163  | 4.3777689726  | 7.7842475061  |
| Ti   | -0.0066890208 | -0.9108059272 | 7.8067310256  |
| O    | -1.8892852126 | 2.4510383370  | 7.0433627173  |
| O    | 0.0033541296  | -2.7536167665 | 7.0788683255  |
| O    | -1.8908370000 | 4.6368580000  | 5.8721510000  |
| O    | 0.0000000000  | -0.5773160000 | 5.8721320000  |
| Ti   | 0.0000000000  | -2.4491710000 | 5.1437830000  |
| Ti   | -1.8908370000 | 2.7649550000  | 5.1437830000  |
| O    | -1.8908370000 | -2.8416350000 | 4.9910730000  |
| O    | 0.0000000000  | 2.3724150000  | 4.9910430000  |
| O    | 0.0000000000  | -4.3210260000 | 4.4154330000  |
| O    | -1.8908370000 | 0.8930530000  | 4.4154150000  |
| Ti   | -1.8908370000 | -4.7135180000 | 4.2627130000  |
| Ti   | 0.0000000000  | 0.5005470000  | 4.2626890000  |
| O    | -1.8908370000 | 3.8431630000  | 3.5343580000  |
| O    | 0.0000000000  | -1.3710380000 | 3.5343290000  |
| O    | -1.8908370000 | -4.4203560000 | 2.3478220000  |
| O    | 0.0000000000  | 0.7937220000  | 2.3478030000  |
| Ti   | 0.0000000000  | -1.0778350000 | 1.6194540000  |
| Ti   | -1.8908370000 | 4.1362920000  | 1.6194540000  |
| O    | -1.8908370000 | -1.4702990000 | 1.4667440000  |
| O    | 0.0000000000  | 3.7437510000  | 1.4667150000  |
| O    | 0.0000000000  | -2.9496900000 | 0.8911050000  |
| O    | -1.8908370000 | 2.2643890000  | 0.8910870000  |
| Ti   | -1.8908370000 | -3.3421820000 | 0.7383840000  |
| Ti   | 0.0000000000  | 1.8718830000  | 0.7383600000  |
| O    | -1.8908370000 | -5.2140510000 | 0.0100290000  |
| O    | 0.0000000000  | 0.0000000000  | 0.0100000000  |
| O    | 1.7720932588  | -1.0774354303 | 14.1701750927 |
| H    | 1.2698400181  | -1.8865148818 | 13.9115999177 |
| H    | -1.1003790839 | -1.4094169547 | 14.2981809504 |
| O    | 0.2691164572  | 3.8893186629  | 13.8721194027 |
| H    | -0.5875173294 | 3.5502956615  | 14.1946117872 |
| H    | 0.9712180977  | 2.8080848869  | 13.4742399554 |

| TS3 <sub>b</sub> |               |               |               |
|------------------|---------------|---------------|---------------|
| O                | -1.9398576525 | 1.9147229182  | 12.9340970019 |
| O                | 0.0216508024  | -3.3725767659 | 12.9769974494 |
| Ti               | 1.9179415198  | -0.0187372015 | 12.1341624217 |
| Ti               | -0.0231239429 | 5.1258234369  | 12.3752141093 |
| O                | -1.8921186665 | 4.8181649529  | 12.1276604735 |
| O                | 0.0307075558  | -0.4392751363 | 12.1799161288 |
| O                | -0.0067410625 | 3.3570233530  | 11.4128717889 |
| O                | -1.8634537060 | -1.8690683789 | 11.4311485632 |
| Ti               | -1.8964733533 | 2.9374588783  | 11.3799539456 |
| Ti               | 0.0394057231  | -2.2955673701 | 11.2591642221 |
| O                | 1.9276004225  | 1.0529633770  | 10.6025954793 |
| O                | -0.0039256315 | -4.1017948846 | 10.6306409876 |
| O                | -1.8990056987 | 3.2319426775  | 9.3877053232  |
| O                | 0.0243489113  | -1.9380633773 | 9.4072358066  |
| Ti               | -0.0005202325 | -3.8437916411 | 8.7055564990  |
| Ti               | -1.8786316963 | 1.4037558359  | 8.6555227044  |
| O                | -1.8907177719 | -4.2251676627 | 8.5546178526  |
| O                | 0.0135650882  | 0.9980239199  | 8.5298600500  |
| O                | -0.0003788129 | 4.7283788823  | 7.9465991005  |
| O                | -1.8788995195 | -0.4932636782 | 7.9284499958  |
| Ti               | -1.8913566532 | 4.3264094743  | 7.8114744202  |
| Ti               | 0.0119654876  | -0.8784638016 | 7.7728602184  |
| O                | 1.9010234625  | 2.4564169364  | 7.0533147357  |
| O                | -0.0008390816 | -2.7492696749 | 7.0735540615  |
| O                | -1.8908370000 | 4.6368580000  | 5.8721510000  |
| O                | 0.0000000000  | -0.5773160000 | 5.8721320000  |
| Ti               | 0.0000000000  | -2.4491710000 | 5.1437830000  |
| Ti               | -1.8908370000 | 2.7649550000  | 5.1437830000  |
| O                | -1.8908370000 | -2.8416350000 | 4.9910730000  |
| O                | 0.0000000000  | 2.3724150000  | 4.9910430000  |
| O                | 0.0000000000  | -4.3210260000 | 4.4154330000  |
| O                | -1.8908370000 | 0.8930530000  | 4.4154150000  |
| Ti               | -1.8908370000 | -4.7135180000 | 4.2627130000  |
| Ti               | 0.0000000000  | 0.5005470000  | 4.2626890000  |
| O                | -1.8908370000 | 3.8431630000  | 3.5343580000  |
| O                | 0.0000000000  | -1.3710380000 | 3.5343290000  |
| O                | -1.8908370000 | -4.4203560000 | 2.3478220000  |
| O                | 0.0000000000  | 0.7937220000  | 2.3478030000  |
| Ti               | 0.0000000000  | -1.0778350000 | 1.6194540000  |
| Ti               | -1.8908370000 | 4.1362920000  | 1.6194540000  |
| O                | -1.8908370000 | -1.4702990000 | 1.4667440000  |
| O                | 0.0000000000  | 3.7437510000  | 1.4667150000  |
| O                | 0.0000000000  | -2.9496900000 | 0.8911050000  |
| O                | -1.8908370000 | 2.2643890000  | 0.8910870000  |
| Ti               | -1.8908370000 | -3.3421820000 | 0.7383840000  |
| Ti               | 0.0000000000  | 1.8718830000  | 0.7383600000  |
| O                | -1.8908370000 | -5.2140510000 | 0.0100290000  |
| O                | 0.0000000000  | 0.0000000000  | 0.0100000000  |
| O                | -1.8169636042 | -0.0258120520 | 14.2059332853 |
| H                | -0.9211796580 | -0.2239433127 | 14.5383651788 |
| H                | 0.3505941958  | -3.1231000346 | 13.8536983197 |
| O                | 0.0458173687  | 4.5740615303  | 14.1290588011 |
| H                | 0.8791273532  | 4.2225372297  | 14.4937552492 |
| H                | -1.8567382162 | 1.2092861107  | 13.8413526349 |



| I3 <sub>b</sub> |               |               |               |
|-----------------|---------------|---------------|---------------|
| O               | 1.8766446576  | 1.7884235350  | 12.9127057771 |
| O               | -0.1255348811 | 7.1902816714  | 13.0626728892 |
| Ti              | 1.8912066532  | 0.1294033681  | 12.1524063916 |
| Ti              | -0.0693355239 | 5.1746631698  | 12.3252695170 |
| O               | 1.8731657396  | 4.8357756207  | 12.1147042577 |
| O               | 0.0191509124  | 10.0663207228 | 12.1554659686 |
| O               | -0.0189041489 | 3.3471103831  | 11.4745215084 |
| O               | 1.8971654365  | 8.5500679204  | 11.4457388751 |
| Ti              | 1.8727518027  | 2.9164102298  | 11.3979071633 |
| Ti              | 0.0699507518  | 8.2182821712  | 11.2709569577 |
| O               | 1.9005992182  | 1.0470137061  | 10.5528382769 |
| O               | 0.0140546145  | 6.3558539177  | 10.6624778978 |
| O               | 1.8798536532  | 3.2395874205  | 9.4001728240  |
| O               | -0.0015721964 | 8.5047109977  | 9.4027979628  |
| Ti              | -0.0066943536 | 6.6061378401  | 8.7305671209  |
| Ti              | 1.8923166159  | 1.4144822246  | 8.6256388857  |
| O               | 1.8896505820  | 6.2129336228  | 8.5788884993  |
| O               | 0.0018691632  | 1.0122081370  | 8.5009107032  |
| O               | -0.0027099016 | 4.7452302427  | 7.9566937355  |
| O               | 1.8918792111  | 9.9441916219  | 7.9195984271  |
| Ti              | 1.8872657839  | 4.3465511479  | 7.8225020081  |
| Ti              | 0.0018298652  | 9.5551533466  | 7.7705715723  |
| O               | 1.8937400172  | 2.4771863008  | 7.0501258310  |
| O               | 0.0005408838  | 7.6790136890  | 7.0773056498  |
| O               | 1.8908630000  | 4.6368580000  | 5.8721510000  |
| O               | 0.0000000000  | 9.8512340000  | 5.8721320000  |
| Ti              | 0.0000000000  | 7.9793790000  | 5.1437830000  |
| Ti              | 1.8908630000  | 2.7649550000  | 5.1437830000  |
| O               | 1.8908630000  | 7.5869150000  | 4.9910730000  |
| O               | 0.0000000000  | 2.3724150000  | 4.9910430000  |
| O               | 0.0000000000  | 6.1075240000  | 4.4154330000  |
| O               | 1.8908630000  | 0.8930530000  | 4.4154150000  |
| Ti              | 1.8908630000  | 5.7150320000  | 4.2627130000  |
| Ti              | 0.0000000000  | 0.5005470000  | 4.2626890000  |
| O               | 1.8908630000  | 3.8431630000  | 3.5343580000  |
| O               | 0.0000000000  | 9.0575120000  | 3.5343290000  |
| O               | 1.8908630000  | 6.0081940000  | 2.3478220000  |
| O               | 0.0000000000  | 0.7937220000  | 2.3478030000  |
| Ti              | 0.0000000000  | 9.3507150000  | 1.6194540000  |
| Ti              | 1.8908630000  | 4.1362920000  | 1.6194540000  |
| O               | 1.8908630000  | 8.9582510000  | 1.4667440000  |
| O               | 0.0000000000  | 3.7437510000  | 1.4667150000  |
| O               | 0.0000000000  | 7.4788600000  | 0.8911050000  |
| O               | 1.8908630000  | 2.2643890000  | 0.8910870000  |
| Ti              | 1.8908630000  | 7.0863680000  | 0.7383840000  |
| Ti              | 0.0000000000  | 1.8718830000  | 0.7383600000  |
| O               | 1.8908630000  | 5.2144990000  | 0.0100290000  |
| O               | 0.0000000000  | 0.0000000000  | 0.0100000000  |
| O               | 2.0465536883  | 9.3233743637  | 14.1405655203 |
| H               | 2.5750700355  | 8.5447755733  | 13.8085921302 |
| H               | 0.5553276602  | 7.2621292666  | 13.7549487599 |
| O               | 0.0674547213  | 4.7090803150  | 14.1129572251 |
| H               | 0.9093250103  | 4.3578022586  | 14.4566177068 |
| H               | 2.6543321922  | 9.7958225046  | 14.7372984617 |

| TS4 <sub>b</sub> |               |               |               |
|------------------|---------------|---------------|---------------|
| O                | 1.8976257315  | 1.7122753457  | 12.9174068992 |
| O                | -0.0887263716 | -3.2824088266 | 12.9971256940 |
| Ti               | -1.8904724398 | 0.0353390000  | 12.1399677377 |
| Ti               | -0.0143017671 | 5.1344288218  | 12.1054616564 |
| O                | 1.8959424620  | 4.7279745900  | 12.1479508641 |
| O                | 0.0211447574  | -0.4262094512 | 12.1707746655 |
| O                | 0.0047945056  | 3.2770982885  | 11.4645469264 |
| O                | -1.8848585670 | -1.9058243366 | 11.4114236637 |
| Ti               | 1.8988827763  | 2.8112373997  | 11.4212453996 |
| Ti               | 0.0252831405  | -2.3044746914 | 11.4034702811 |
| O                | -1.8744213124 | 0.9915523544  | 10.5561139175 |
| O                | 0.0270131106  | -4.1802818667 | 10.6290314895 |
| O                | 1.8929868083  | 3.2060553502  | 9.4088125403  |
| O                | 0.0026076299  | -1.9941669603 | 9.4002576917  |
| Ti               | 0.0021818302  | -3.8021050210 | 8.6549192328  |
| Ti               | -1.8838915360 | 1.4055546091  | 8.6192943550  |
| O                | 1.8964092456  | -4.2301031660 | 8.5585778879  |
| O                | 0.0074307785  | 0.9889553782  | 8.5168541568  |
| O                | 0.0035296465  | 4.7127481136  | 7.9474228519  |
| O                | -1.8849849005 | -0.5068611231 | 7.9292739305  |
| Ti               | 1.8931004461  | 4.3271261951  | 7.8256970797  |
| Ti               | 0.0074286000  | -0.8907948774 | 7.8126149916  |
| O                | -1.8851497127 | 2.4572443056  | 7.0499364356  |
| O                | 0.0045673423  | -2.7734121743 | 7.0587562297  |
| O                | -1.8908370000 | 4.6368580000  | 5.8721510000  |
| O                | 0.0000000000  | -0.5773160000 | 5.8721320000  |
| Ti               | 0.0000000000  | -2.4491710000 | 5.1437830000  |
| Ti               | -1.8908370000 | 2.7649550000  | 5.1437830000  |
| O                | -1.8908370000 | -2.8416350000 | 4.9910730000  |
| O                | 0.0000000000  | 2.3724150000  | 4.9910430000  |
| O                | 0.0000000000  | -4.3210260000 | 4.4154330000  |
| O                | -1.8908370000 | 0.8930530000  | 4.4154150000  |
| Ti               | -1.8908370000 | -4.7135180000 | 4.2627130000  |
| Ti               | 0.0000000000  | 0.5005470000  | 4.2626890000  |
| O                | -1.8908370000 | 3.8431630000  | 3.5343580000  |
| O                | 0.0000000000  | -1.3710380000 | 3.5343290000  |
| O                | -1.8908370000 | -4.4203560000 | 2.3478220000  |
| O                | 0.0000000000  | 0.7937220000  | 2.3478030000  |
| Ti               | 0.0000000000  | -1.0778350000 | 1.6194540000  |
| Ti               | -1.8908370000 | 4.1362920000  | 1.6194540000  |
| O                | -1.8908370000 | -1.4702990000 | 1.4667440000  |
| O                | 0.0000000000  | 3.7437510000  | 1.4667150000  |
| O                | 0.0000000000  | -2.9496900000 | 0.8911050000  |
| O                | -1.8908370000 | 2.2643890000  | 0.8910870000  |
| Ti               | -1.8908370000 | -3.3421820000 | 0.7383840000  |
| Ti               | 0.0000000000  | 1.8718830000  | 0.7383600000  |
| O                | -1.8908370000 | -5.2140510000 | 0.0100290000  |
| O                | 0.0000000000  | 0.0000000000  | 0.0100000000  |
| O                | -1.7331436110 | -1.0463165488 | 14.1810548114 |
| H                | -1.3452694212 | -1.9180595117 | 13.9178959516 |
| H                | 0.0662553239  | -4.0735947787 | 13.8453714289 |
| O                | 0.0704329852  | 5.1389436055  | 14.1605495184 |
| H                | 0.9388821094  | 4.8311470473  | 14.4810890504 |
| H                | -1.0105983912 | -0.6016571345 | 14.6617697094 |
